# Supplementary material for: Does 5 + 5 Equal Better Radiation Treatment Plans in Head and Neck Cancers?
Source: PubMed Central journal article supplement — Adv Radiat Oncol. 2019 Jun 12;4(4):683–8. doi: 10.1016/j.adro.2019.06.001 (PMC6817533; doi:10.1016/j.adro.2019.06.001), 2019-06-12
Supplement: mmc1.pdf [file mmc1.pdf]

## APPENDIX

| <b>Appendix A – Original Radiation Treatment Plan Information</b> |                     |                       |               |                    |                            |
|-------------------------------------------------------------------|---------------------|-----------------------|---------------|--------------------|----------------------------|
|                                                                   | <b>All Patients</b> | <b>Base of Tongue</b> | <b>Tonsil</b> | <b>Hypopharynx</b> | <b>Supraglottic Larynx</b> |
| <b>GTV volume (cm<sup>3</sup>)</b>                                |                     |                       |               |                    |                            |
| Median                                                            | 15.9                | 14.7                  | 18.8          | 18.7               | 12.4                       |
| Range                                                             | 1.8 – 159.2         | 2.2 – 159.2           | 3.0 – 82.3    | 2.2 – 82.5         | 1.8 – 44                   |
| <b>PTV-P1 D95<sup>1</sup> (cGy)</b>                               |                     |                       |               |                    |                            |
| Median                                                            | 7026.5              | 7021                  | 7027          | 7020               | 7051                       |
| Range                                                             | 6743 – 7145         | 6858 – 7088           | 7001 – 7073   | 6743 – 7059        | 7006 – 7145                |
| <b>PTV-P1 D99<sup>2</sup> (cGy)</b>                               |                     |                       |               |                    |                            |
| Median                                                            | 6916                | 6910                  | 6909          | 6869               | 6943                       |
| Range                                                             | 6649 – 7072         | 6658 – 7023           | 6676 – 7010   | 6649 – 7004        | 6783 – 7072                |
| <b>PTV-56 D95<sup>3</sup> (cGy)</b>                               |                     |                       |               |                    |                            |
| Median                                                            | 5625.5              | 5618                  | 5630          | 5626               | 5631                       |
| Range                                                             | 5399 – 5698         | 5575 – 5655           | 5600 – 5681   | 5399 – 5698        | 5601 – 5671                |

GTV – gross tumor volume; PTV – planning tumor volume; P1 – high-dose margin;

<sup>1</sup>Dose that covered hottest 95% of PTV-P1 volume on clinical plan without 5+5 rule

<sup>2</sup>Dose that covered hottest 99% of PTV-P1 volume on clinical plan without 5+5 rule

<sup>3</sup>Dose that covered hottest 95% of PTV-56 volume (for elective nodal regions) on clinical plan without 5+5 rule
